# Supplementary material for: MMP2 and TLRs modulate immune responses in the tumor microenvironment
Source: PubMed Central journal article supplement (PMC8262464; doi:10.1172/jci.insight.144913), 2021-06-22
Supplement: jciinsight-6-144913-s193.pdf [file jciinsight-6-144913-s193.pdf]

## SUPPLEMENTAL DATA

### Supplemental Figures

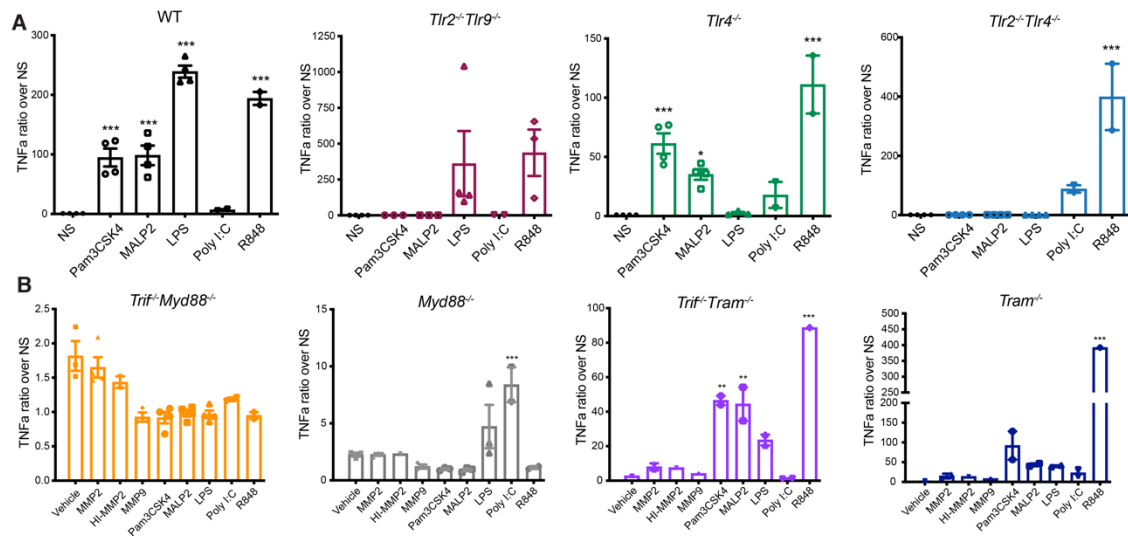

Figure S1. MMP2 and TLR agonist responses in immortalized BM cells: Pro-inflammatory cytokine secretion from immortalized BMDMs stimulated with MMP2, HI MMP-2, MMP9, Vehicle and TLR agonists controls *in vitro*. TNF $\alpha$  from WT and *Tlr*-deficient Im-Macs (A) and from TLR-signaling molecules (B) in response to stimulation. Each graph represents the ratio over unstimulated from each cell line depicted. Stimulations were performed with  $2 \times 10^5$  cells per condition in 200 $\mu$ l volume. 16-18 hours post stimulation, supernatants were collected and cytometric bead array for mouse inflammatory cytokines was performed. Data is representative of 2-4 experiments with mean  $\pm$  SEM. \* is  $p < 0.05$  and \*\* is  $p < 0.01$  and \*\*\* is  $p < 0.001$ . One-way ANOVA with Dunnet's post hoc comparison.

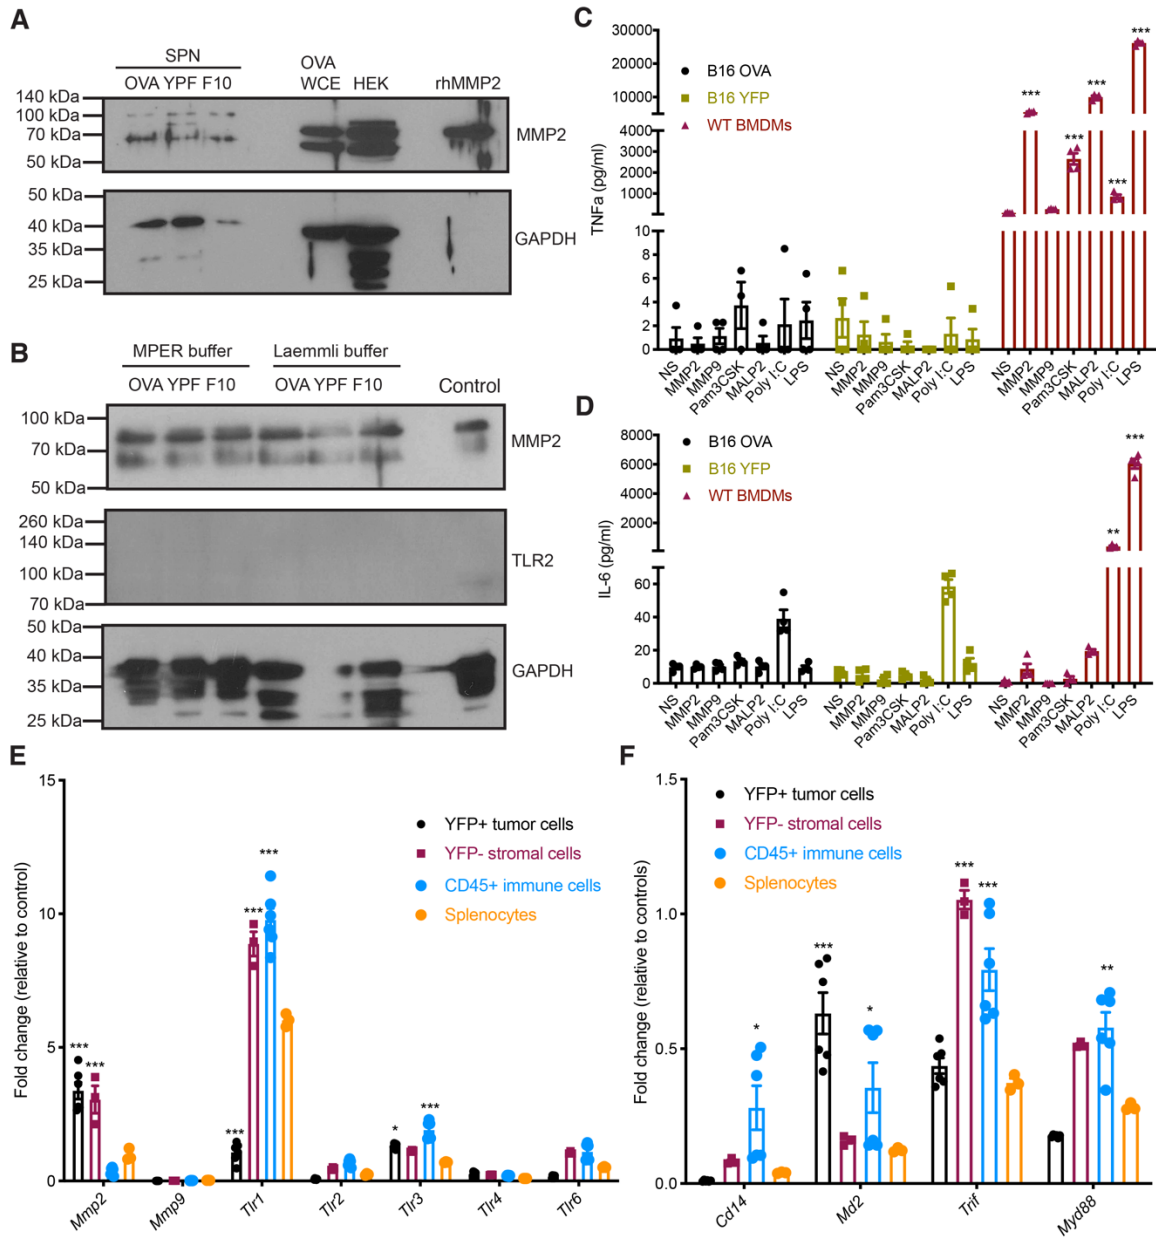

Figure S2. MMP2 and TLR expression in B16 melanoma cells: A-B. Western Blot analysis of MMP2 and TLR2 in B16 F1 and F10 cell lines from supernatant (SPN; A) and whole cell extract (WCE; B). C-D. TNF $\alpha$  (C) and IL-6 (D) secretion by B16 F1 cells after in vitro activation. Cells were activated with different TLR agonists for 20 hours and supernatant was collected and analyzed by CBA. Data is representative of 3 experiments with mean  $\pm$  SEM. \*  $p > 0.05$ , \*\*  $p > 0.01$  and \*\*\* $p > 0.001$ . Two-way ANOVA with Dunnett's post hoc correction for multiple

comparisons (significance against BMDMs). E-F. MMPs and TLR (E) and TLR-adaptors (F) mRNA gene expression comparing sorted tumor and stromal cells to whole tumor. Fold change was normalized to *Gapdh*. Each sample was done in triplicates and data is representative of 2 experiments with mean  $\pm$  SEM. \*  $p > 0.05$ , \*\*  $p > 0.01$ , \*\*\*  $p > 0.001$ . Two-way ANOVA with Dunnett's post hoc correction for multiple comparisons (significance against splenocytes).

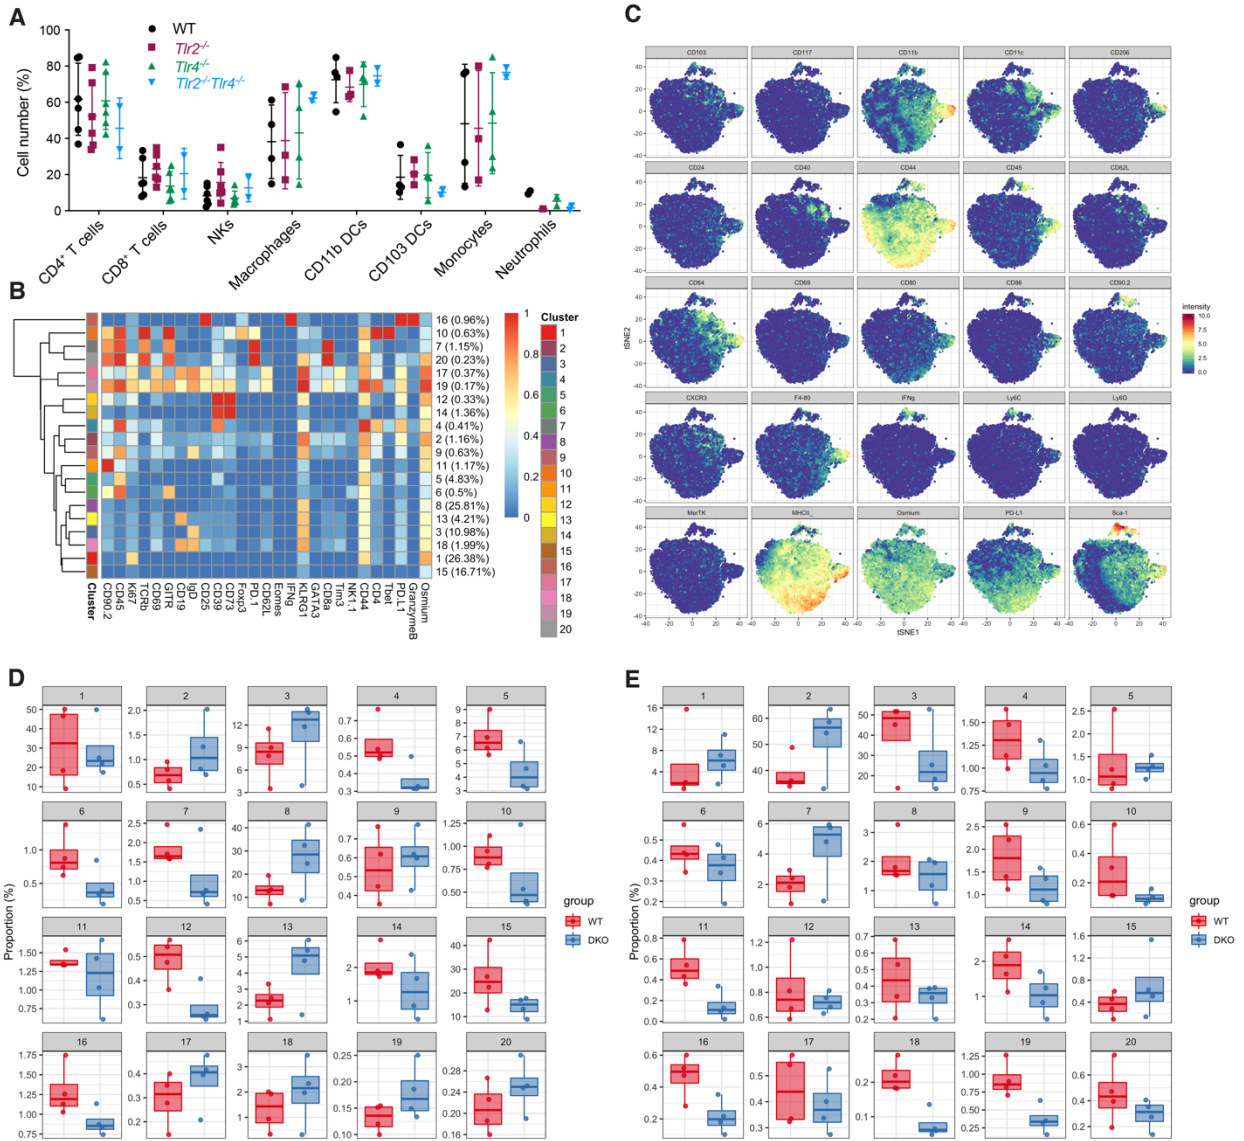

Figure S3. Differences in the tumor microenvironment in *Tlr2*<sup>-/-</sup>*Tlr4*<sup>-/-</sup> mice:  $3 \times 10^5$  B16 F1 cells were injected sub-cutaneously into WT or TLR deficient mice and tumors were analyzed 15-19 days later. A. FACS analysis of immune cells in WT, *Tlr2*<sup>-/-</sup>, *Tlr4*<sup>-/-</sup> and *Tlr2*<sup>-/-</sup>*Tlr4*<sup>-/-</sup> mice at day 15. Data is representative of 3 experiments with mean  $\pm$  SEM. Two-way ANOVA with Dunnett's post hoc correction for multiple comparisons. B-E. CyTOF analysis of tumors between WT and *Tlr2*<sup>-/-</sup>*Tlr4*<sup>-/-</sup> mice. Heatmap of the 20 identified clusters from the CyTOF panels showing the expression of antigens for each cluster (B) with plots of single antigens expressed in the tumors at day 19

(C). Lymphoid clusters (D) and myeloid clusters (E) of the differentially expressed between WT and *Tlr2<sup>-/-</sup>Tlr4<sup>-/-</sup>* mice. Data is representative of 3-5 mice with mean  $\pm$  SEM. \* is  $p < 0.05$ , \*\* is  $p < 0.01$ . p values were adjusted using FDR. Statistical analysis was performed using binomial generalized linear mixed-effects model (GLMM).

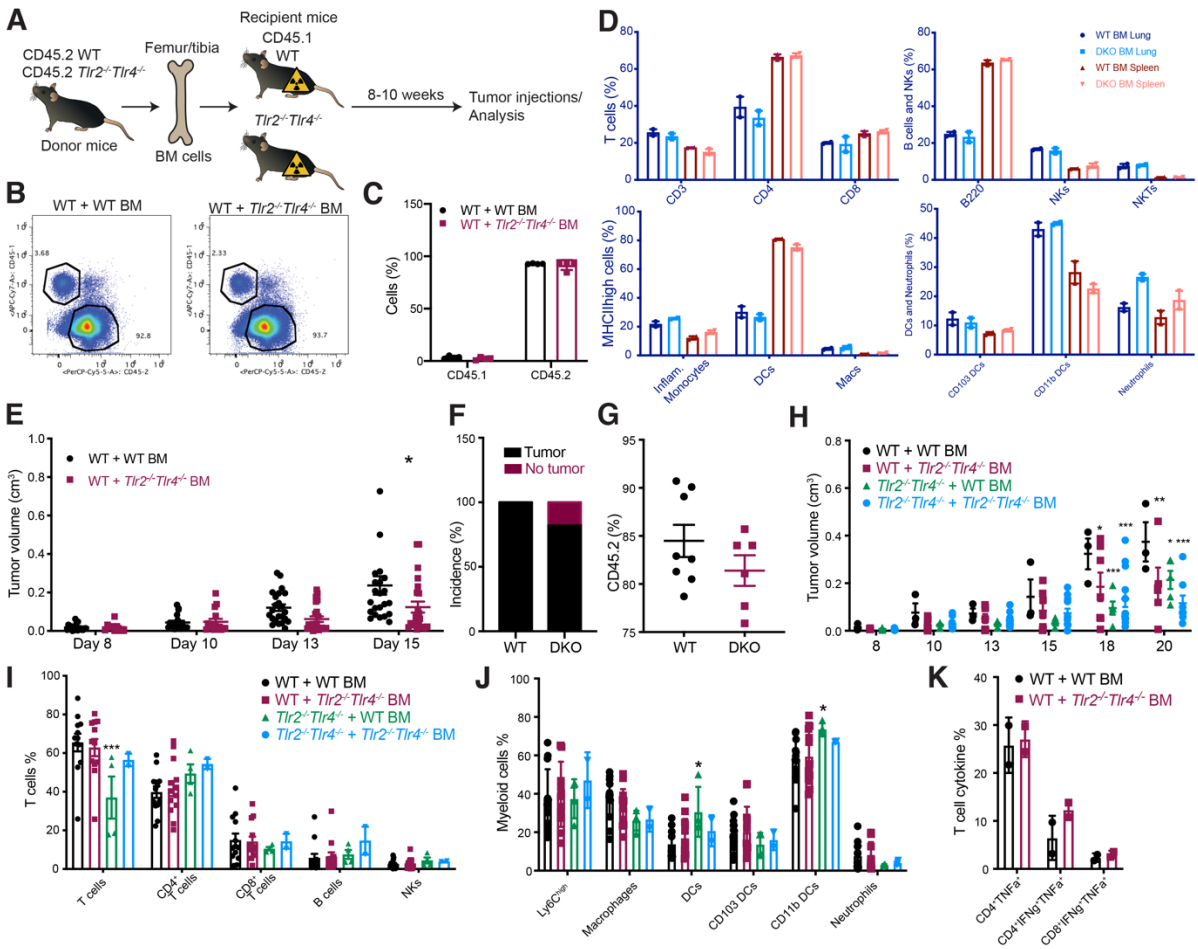

Figure S4. TLR2 and TLR4 expression is required in the hematopoietic compartment to support tumor growth: CD45.1 WT mice were irradiated with 1200 Grays (2x 600 Grays, 3 hours apart) and injected with  $4 \times 10^6$  WT or *Tlr2*<sup>-/-</sup>*Tlr4*<sup>-/-</sup> (DKO) BMs. A. BM transfer schematic. B-C. CD45.1 versus CD45.2 engraftment in blood WT mice that received WT and *Tlr2*<sup>-/-</sup>*Tlr4*<sup>-/-</sup> BM cells, 6-8 weeks post transfer. Representative plots (B) and cell percentage values (C) are displayed. D. Engraftment of cells in lungs and spleen of mice, 9-10 weeks post transfer. Reconstitution was similar in mice that received WT (dark colors) or DKO (lighter colors) BMs. N=10 mice per group. Mean  $\pm$  SEM. Two-way ANOVA with Dunnett's post hoc correction for multiple comparisons. E-G. Mice were subcutaneously injected with  $3 \times 10^5$  B16 F1 cells and tumors were measured up to 16 days. Tumor volume (E), incidence (F) and total hematopoietic cell number in tumor infiltrates

(G) was analyzed. N=23 mice per group for tumor growth. Mean  $\pm$  SEM. \* is  $p < 0.05$  \*\*is  $p < 0.01$  and \*\*\*is  $p < 0.001$ . Two-way ANOVA with Sidak's post hoc correction for multiple comparisons.

H. Tumor growth comparison including *Tlr2<sup>-/-</sup>Tlr4<sup>-/-</sup>* recipients. Data is representative of 3 experiments.

I-K. Immune cell infiltrates in tumors from WT and *Tlr2<sup>-/-</sup>Tlr4<sup>-/-</sup>* mice that received WT or *Tlr2<sup>-/-</sup>Tlr4<sup>-/-</sup>* BM cells. Lymphoid (I), Myeloid (J) and T cell cytokine (K) infiltrates between the groups. Data is representative of 3 experiments. For H-J: Mean  $\pm$  SEM. \* is  $p < 0.05$  \*\*is  $p < 0.01$  and \*\*\*is  $p < 0.001$ . Two-way ANOVA with Dunnett's post hoc correction for multiple comparisons.

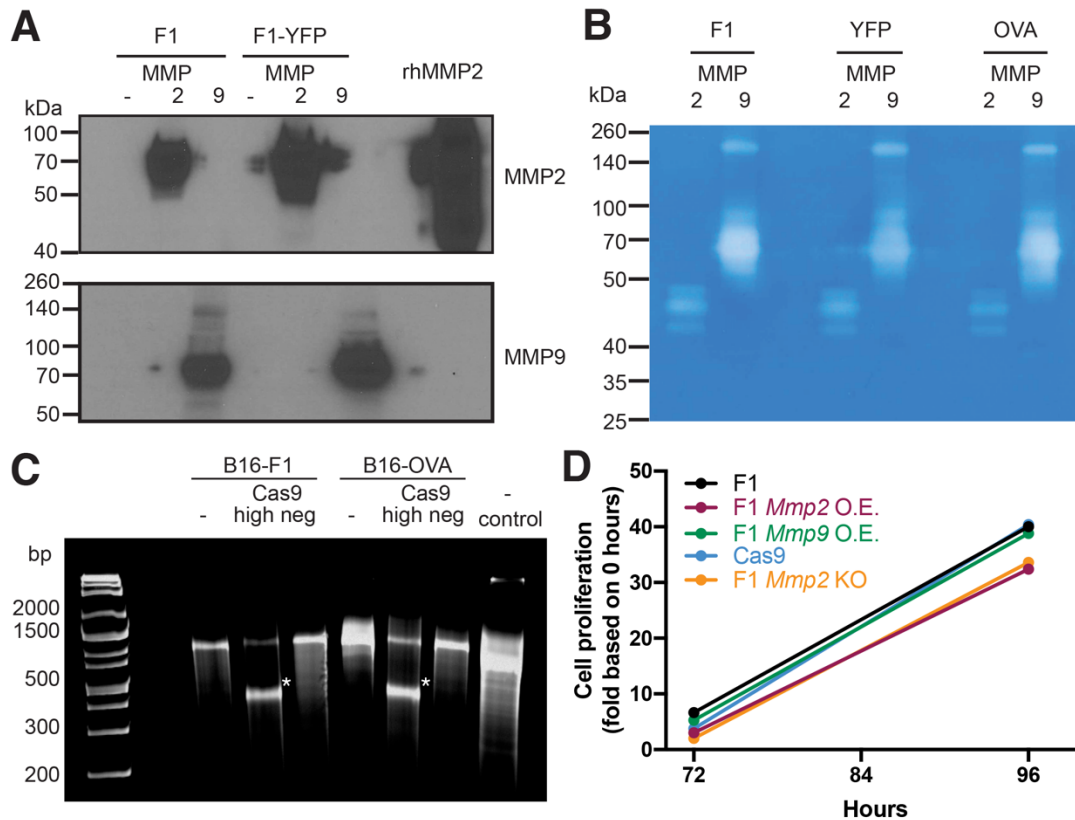

Figure S5. MMP-2 overexpression and depletion in B16 cells: The levels of MMP-2 in the B16 was modulated by overexpression and knock out CRISPR systems. A. Western blot images confirm overexpression of MMP-2 (~72kDa) and MMP-9 (~90kDa) in the B16 cells. B. Zymography assay confirms secretion of active MMP-2 and MMP-9 in the B16 cell lines. C. Surveyor assay of B16 F1 and OVA lines that were KO for MMP2 using a CRISPR-Cas9-GFP system. \* indicate the bands that show effective endonuclease activity and mismatch. D. Cell growth rates between the different cell lines (MMP-2 competent and deficient cells).



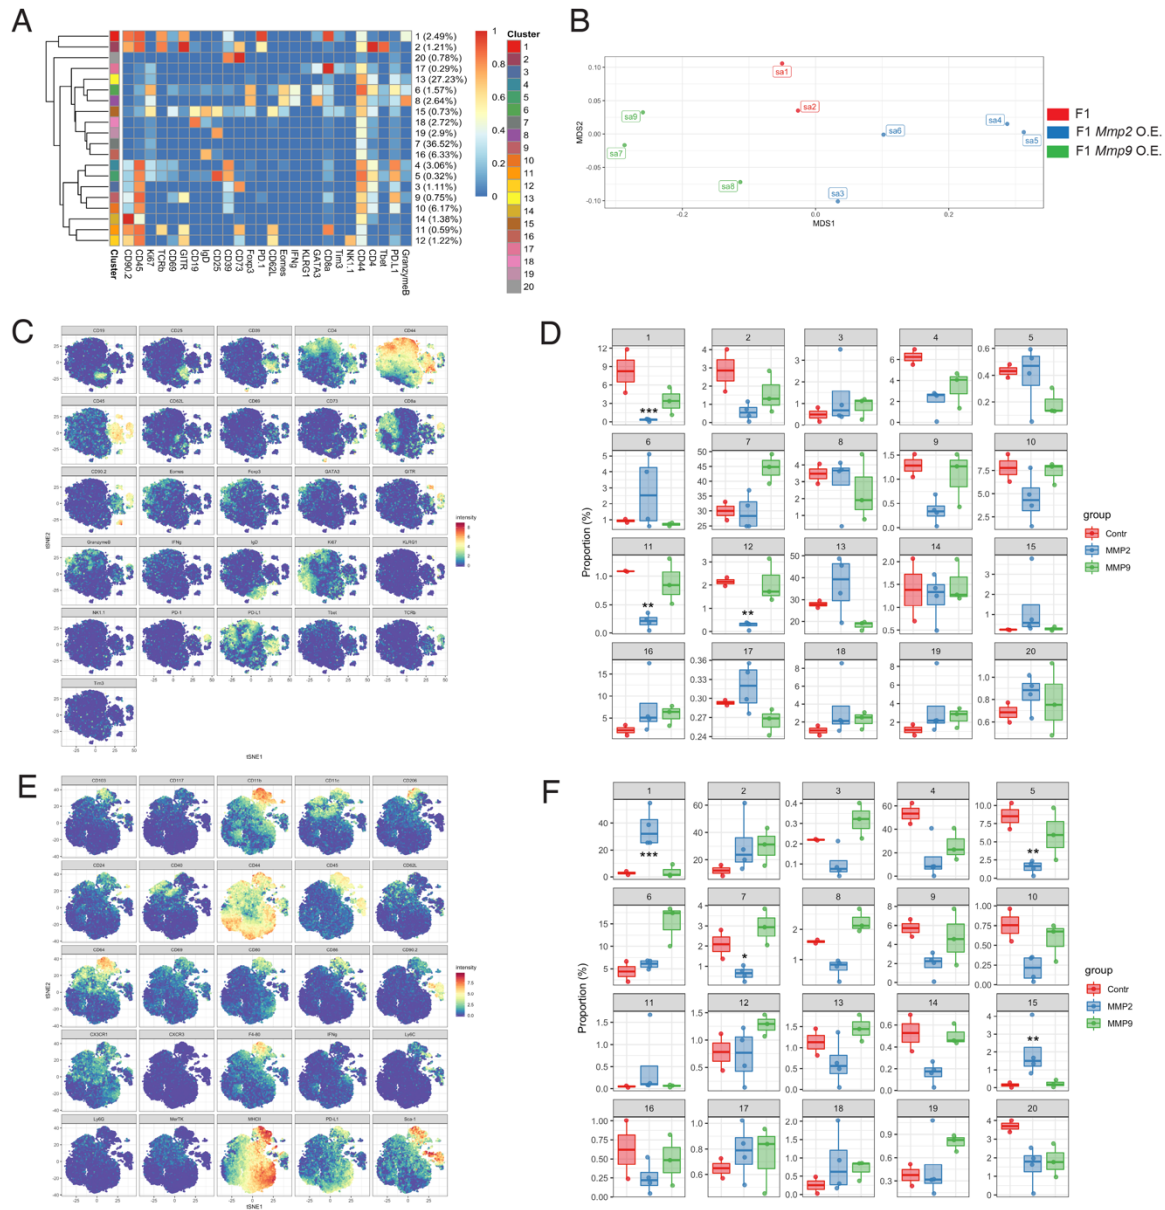

Figure S6. CyTOF comparison of tumors with MMP overexpression: CyTOF analysis of WT mice injected with F1, F1 MMP-2 OE and F1 MMP-9 OE tumors. A. Heatmap plot of the 20 clusters identified by CyTOF. B. Multidimensional scaling plot showing samples distribution/grouping. C. viSNE plot of single antigen expression in lymphoid panel. D. Differential expression of lymphoid clusters. E. viSNE plot of single antigen expression in myeloid panel. F. Differential expression of myeloid clusters. Data is representative of 3-5 mice with mean  $\pm$  SEM. \* is  $p < 0.05$ , \*\* is  $p < 0.01$ .

p values were adjusted using FDR. Statistical analysis was performed using binomial generalized linear mixed-effects model (GLMM).

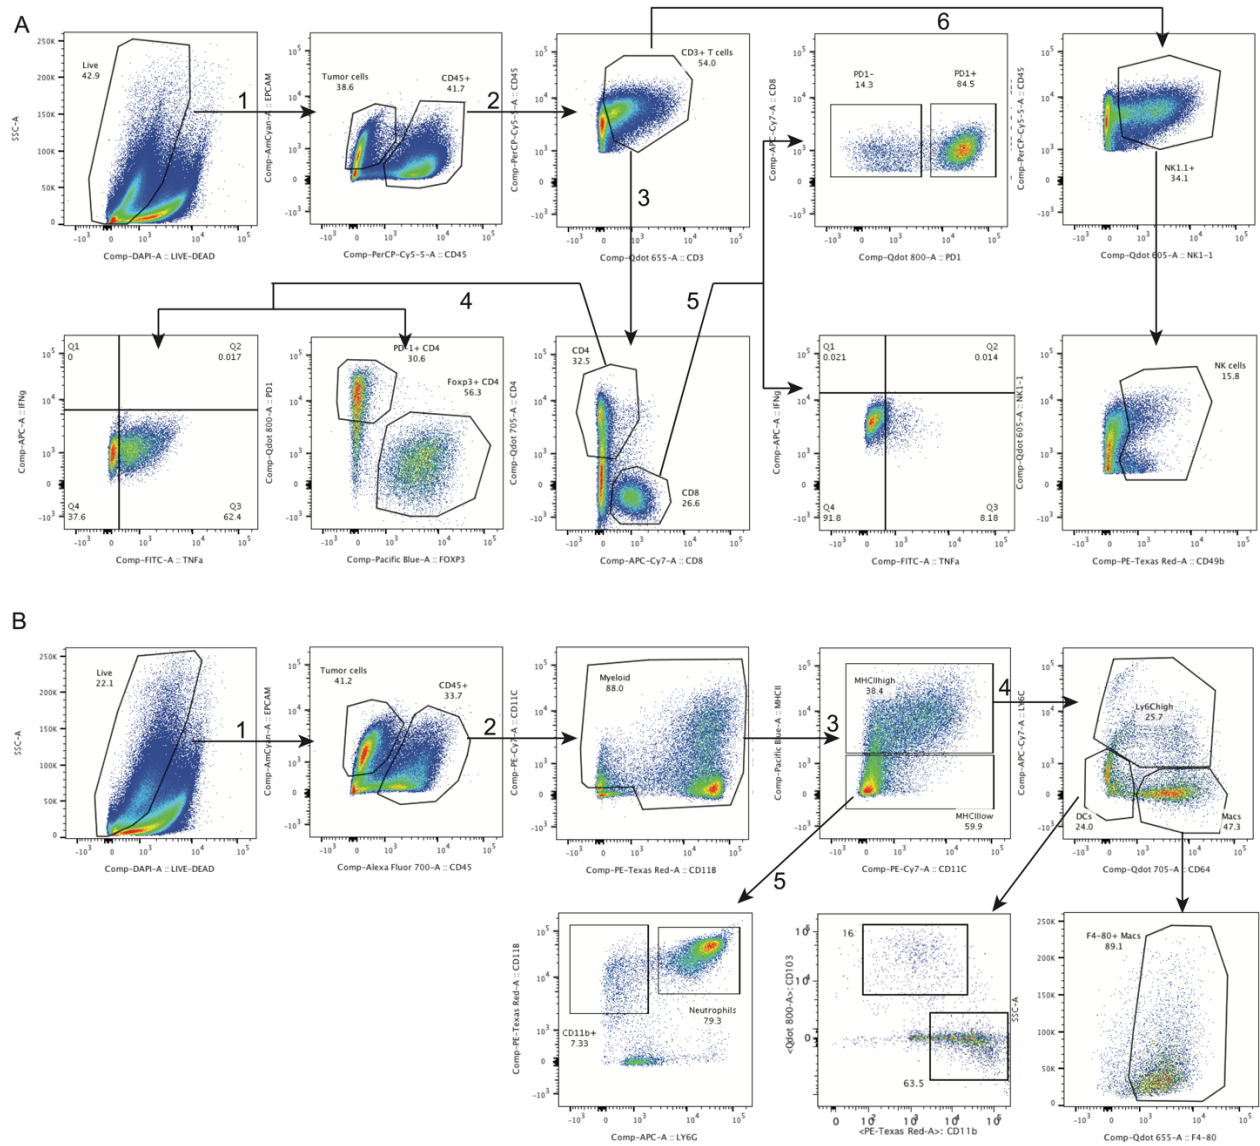

Figure S7. FACS gating strategy of *Mmp2* KO and WT B16 tumors at day 19: Lymphoid panel gating strategy is shown (A). Cells were gated on Live (1), CD45<sup>+</sup> hematopoietic cells (2), then CD3<sup>+</sup> T cells (3), separated on CD4 and CD8 T cells. Within the CD4 T cells, TNF $\alpha$ , IFN $\gamma$ , PD-1 and FoxP3 populations were derived (4). From the CD8 T cells, TNF $\alpha$ , IFN $\gamma$  and PD-1 populations were derived. B. In the myeloid panel, cells were gated on Live (1), CD45<sup>+</sup> hematopoietic cells (2), then myeloid, as CD11c<sup>+</sup> CD11b<sup>+</sup> cells (3). From the myeloid cells, MHCII<sup>high</sup> vs <sup>low</sup> were separated (based on MHCII vs CD11c expression). From the MHCII<sup>high</sup> cells, DCs (Ly6C<sup>-</sup>, CD64<sup>-</sup>

), Macrophages (Ly6C<sup>-</sup>, CD64<sup>+</sup>) and Ly6C<sup>high</sup> cells are gated (4). DCs were further gated into CD103<sup>+</sup> and CD11b<sup>+</sup> subpopulations and from the macrophages, F4-80<sup>+</sup> subpopulations. From the MHCII<sup>low</sup> cells, Neutrophils were gated (CD11b<sup>+</sup>, Ly6G<sup>+</sup>; 5). Data is representative of 3 independent experiments with mean  $\pm$  SEM. N=8-10 mice per group.

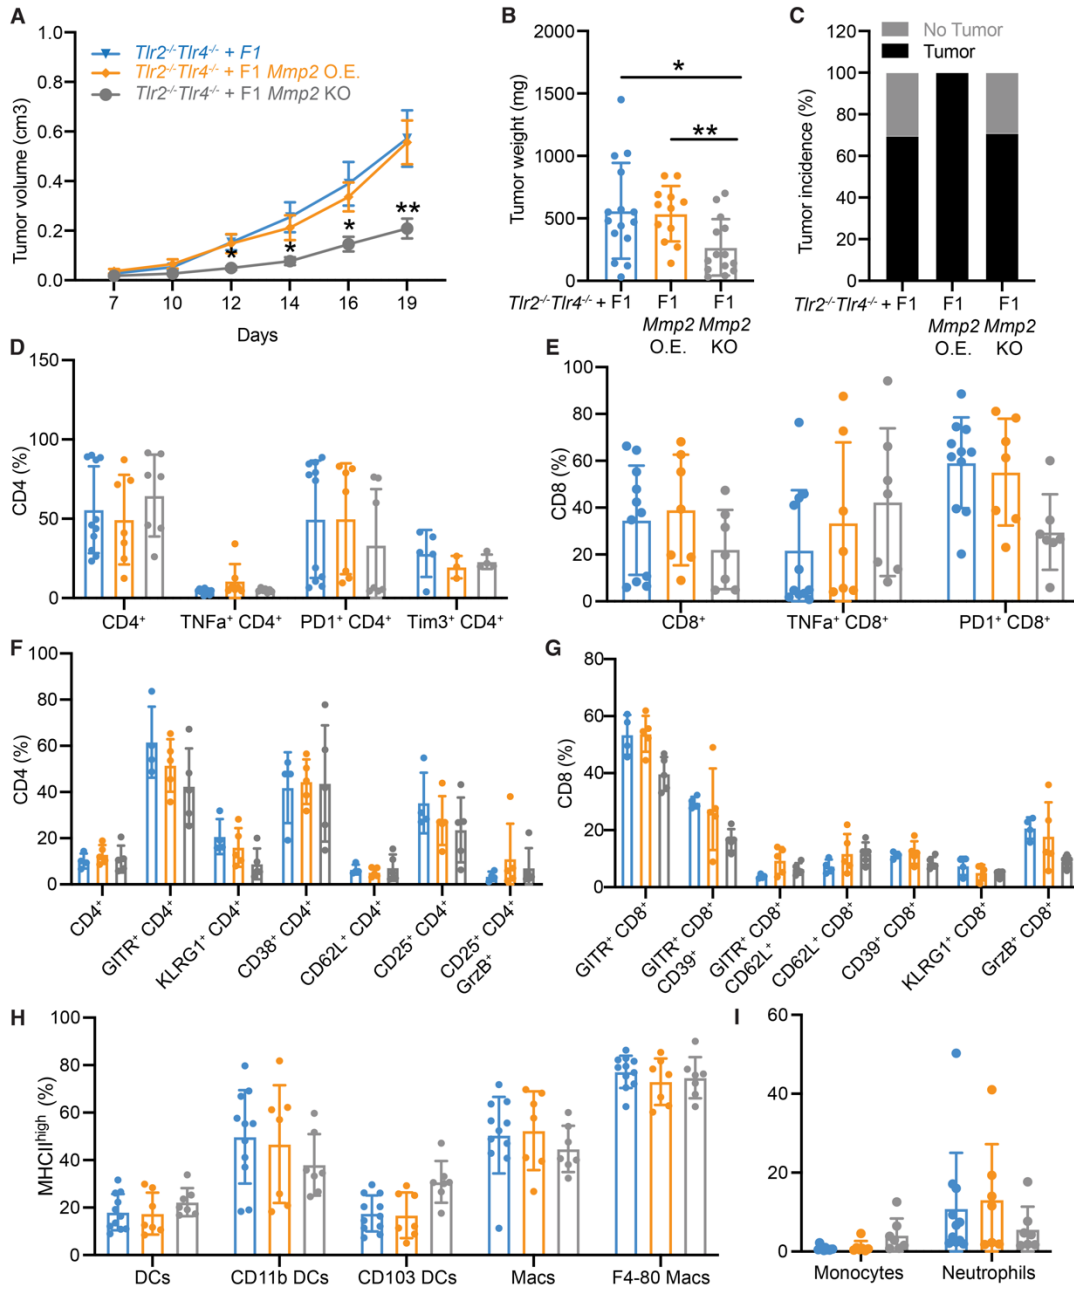

Figure S8. Lack of host TLR2 and TLR4 impacts the effects MMP2 expression in tumors: A-C. Tumor development in *Tlr2*<sup>-/-</sup>*Tlr4*<sup>-/-</sup> mice injected with B16 F1, F1 *Mmp2* O.E. and F1 *Mmp2* KO cells. Tumor growth kinetics (A), tumor weight at collection day 19 (B) and tumor incidence (C). Mean ± SEM. \* is p<0.05 \*\*is p<0.01 and \*\*\*is p<0.001. Two-way ANOVA with Dunnett's post hoc correction for multiple comparisons. D-I. FACS comparison of immune infiltrates in *Tlr2*<sup>-/-</sup>*Tlr4*<sup>-/-</sup>

<sup>-/-</sup> mice. CD4 (D, F), CD8 (E, G) and Myeloid (H-I) populations percentages. Data is representative of 3 experiments with N = 6-10 mice per group with mean  $\pm$  SEM. \* is  $p < 0.05$  and \*\* is  $p < 0.01$  and \*\*\* is  $p < 0.001$ . Two-way ANOVA with Dunnett's post hoc correction for multiple comparisons.

## Supplemental Tables

Table S1: List of antibodies used for Western Blot

| <b>Antibody</b>                               | <b>Host</b> | <b>Manufacturer</b>      | <b>Catalog number</b> |
|-----------------------------------------------|-------------|--------------------------|-----------------------|
| Monoclonal ANTI-FLAG <sup>®</sup> M2 antibody | Mouse       | Sigma-Aldrich            | F1804                 |
| Anti-HA (12CA5)                               | Mouse       | Roche                    | 11 666 606 001        |
| Anti-c-myc                                    | Mouse       | Roche                    | 11 667 149 001        |
| Toll-like Receptor 4 (D8L5W)                  | Rabbit      | Cell Signaling           | 14358                 |
| Toll-like Receptor 2 (E1J2W)                  | Rabbit      | Cell Signaling           | 13744                 |
| Anti-MMP2 antibody                            | Rabbit      | Abcam                    | ab37150               |
| MMP2 (H76)                                    | Rabbit      | Santa Cruz Biotechnology | Sc-10736              |
| Anti-mouse IgG, HRP-linked antibody           | Horse       | Cell Signaling           | 7076                  |
| Anti-rabbit IgG, HRP-linked Antibody          | Goat        | Cell Signaling           | 7074                  |

Table S2: List of antibodies used for flow cytometry

| Target       | Fluorochrome | Manufacturer   | Catalog number | Target        | Fluorochrome  | Manufacturer | Catalog number |
|--------------|--------------|----------------|----------------|---------------|---------------|--------------|----------------|
| Epcam        | BV510        | BioLegend      | 118231         | CD44          | APC-Cy7       | BioLegend    | 103027         |
| CD45         | APC-Cy7      | BioLegend      | 103116         | PD-L1         | BV711         | BioLegend    | 124319         |
| CD3          | BV650        | BioLegend      | 100229         | PD-1          | BV785         | BioLegend    | 135225         |
| CD4          | BV711        | BioLegend      | 100447         | CD31          | PECy7         | BioLegend    | 102417         |
| CD8          | A700         | BioLegend      | 100729         | CD47          | PE-Dazzle 594 | BioLegend    | 27521          |
| B220         | PercPCy5.5   | BioLegend      | 103236         | OX40L         | APC           | BioLegend    | 108811         |
| NK1.1        | BV605        | BioLegend      | 108739         | Ki67          | BV605         | BioLegend    | 652413         |
| CD49b        | PE-CF594     | BD Biosciences | 562453         | XCR1          | APC           | BioLegend    | 148205         |
| IFN $\gamma$ | APC          | BioLegend      | 505810         | Sirp $\alpha$ | APC-Cy7       | BioLegend    | 144017         |
| TNF $\alpha$ | FITC         | eBiosciences   | 11-7321-82     | Siglec-H      | PE            | eBiosciences | 12-0333-80     |
| FoxP3        | BV421        | BioLegend      | 126419         | CD80          | PECy5         | eBiosciences | 15-0801-81     |
| CD11c        | PECy7        | BioLegend      | 117318         | CD86          | BV650         | BioLegend    | 105035         |
| CD11b        | PE-CF594     | BD Biosciences | 562287         | CD206         | A700          | BioLegend    | 141733         |
| MHCII        | e450         | eBiosciences   | 14-5321-82     | CD115         | BV605         | BioLegend    | 104526         |
| CCR2         | PE           | BioLegend      | 150609         | CX3CR1        | BV785         | BioLegend    | 149029         |
| Ly6C         | APC-Cy7      | BioLegend      | 128026         | CD24          | BV421         | BioLegend    | 101825         |
| Ly6G         | APC          | BioLegend      | 127614         | CD69          | APCCy7        | BioLegend    | 104526         |



|       |          |                   |        |               |               |                   |                    |
|-------|----------|-------------------|--------|---------------|---------------|-------------------|--------------------|
| CD64  | BV711    | BioLegend         | 139311 | CD62L         | PE-Dazzle 594 | BioLegend         | 104448             |
| CD103 | BV786    | BD<br>Biosciences | 564322 | CD25          | BV650         | BioLegend         | 102038             |
| F4-80 | BV650    | BioLegend         | 123149 | Tim3          | APC           | eBiosciences      | 17-<br>5871-<br>80 |
| Sca1  | BV421    | BioLegend         | 08127  | Lag3          | PercPCy5.5    | BioLegend         | 125212             |
| gp38  | PE       | BioLegend         | 127407 | CTLA-4        | PE            | BioLegend         | 106305             |
| GATA3 | PE-CF594 | BD<br>Biosciences | 563510 | T-bet         | BV412         | BD<br>Biosciences | 563318             |
| IL-4  | PE-Cy7   | BioLegend         | 504117 | IL-13         | PE-Cy7        | eBiosciences      | 25-<br>7133-<br>80 |
| FoxP3 | PE       | BioLegend         | 126403 | Live-<br>Dead | Blue          | Invitrogen        | L23105             |

Table S3: List of antibodies used for CyTOF

| <b>Channel</b> | <b>Lymphoid Panel Markers</b> | <b>Channel</b> | <b>Myeloid Panel Markers</b> |
|----------------|-------------------------------|----------------|------------------------------|
| 113 In         | CD90.2                        | 113 In         | CD90.2                       |
| 115 In         | C45                           | 115 In         | CD45                         |
| 141 Pr         | Ki67                          | 141 Pr         | Ly6G                         |
| 143 Nd         | TCRb                          | 142 Nd         | CD11c                        |
| 145 Nd         | CD69                          | 144 Nd         | CD24                         |
| 147 Sm         | CD375/GITR                    | 145 Nd         | CD69                         |
| 149 Sm         | CD19                          | 146 Nd         | F4-80                        |
| 150 Nd         | IgD                           | 148 Nd         | CD11b                        |
| 151 Eu         | CD25                          | 152 Sm         | CD86                         |
| 154 Sm         | CD39                          | 156 Gd         | CD64                         |
| 155 Gd         | CD73                          | 158 Gd         | CD117                        |
| 158 Gd         | Foxp3                         | 159 Tb         | CD40                         |
| 159 Tb         | PD-1                          | 160 Gd         | CD62L                        |
| 160 Gd         | CD62L                         | 161 Dy         | CD103                        |
| 164 Dy         | Eomes                         | 162 Dy         | Ly6C                         |
| 165 Ho         | IFNg                          | 164 Dy         | Sca-1                        |
| 166 Er         | KLRG1                         | 165 Ho         | IFNg                         |
| 168 Er         | CD8a                          | 167 Er         | CXCR3                        |
| 169 Tm         | Tim3                          | 168 ER         | MerTK                        |
| 170 Er         | NK1.1                         | 169 Tm         | CD206                        |
| 171 Yb         | CD44                          | 171 Yb         | CD44                         |
| 172 Yb         | CD4                           | 173 Yb         | CD80                         |
| 173 Yb         | Tbet                          | 174 Yb         | MHCII (I-A/I-E)              |
| 175 Lu         | PD-L1                         | 175 Lu         | PD-L1                        |
| 176 Yb         | Granzyme-B                    | 176 Yb         | CX3CR1                       |

Table S4: List of antibodies used for immunofluorescence

| <b>Target</b>          | <b>Host</b> | <b>Fluorochrome</b> | <b>Manufacturer</b>      | <b>Catalog number</b> | <b>Application</b> |
|------------------------|-------------|---------------------|--------------------------|-----------------------|--------------------|
| Granzyme B             | Goat        | Unconjugated        | R&D Systems              | AF1865                | IF, primary        |
| NK1.1                  | Mouse       | Unconjugated        | BioLegend                | 108701                | IF, primary        |
| CD8 $\alpha$           | Rat         | Unconjugated        | BioLegend                | 100702                | IF, primary        |
| CD3e                   | Rabbit      | Unconjugated        | Abcam                    | ab5690                | IF, primary        |
| Ki67                   | Rat         | Unconjugated        | BioLegend,               | 151202                | IF, primary        |
| Anti-Rat IgG (H+L)     | Goat        | Alexa Fluor 488     | Thermo Fisher Scientific | A11006                | IF, secondary      |
| Anti-Rat IgG (H+L)     | Goat        | Alexa Fluor 594     | Thermo Fisher Scientific | A11007                | IF, secondary      |
| Anti-Rabbit IgG (H+L)  | Goat        | Alexa Fluor 488     | Thermo Fisher Scientific | A32731                | IF, secondary      |
| Anti-Rabbit IgG (H+L)  | Goat        | Alexa Fluor 594     | Thermo Fisher Scientific | A32740                | IF, secondary      |
| Anti-Mouse IgG (H+L)   | Goat        | Alexa Fluor 488     | Thermo Fisher Scientific | A32723                | IF, secondary      |
| Anti-Mouse IgG (H+L)   | Goat        | Alexa Fluor 594     | Thermo Fisher Scientific | A32742                | IF, secondary      |
| Anti-Hamster IgG (H+L) | Goat        | Alexa Fluor 488     | Thermo Fisher Scientific | A21110                | IF, secondary      |
| Anti-Hamster IgG (H+L) | Goat        | Alexa Fluor 594     | Thermo Fisher Scientific | A21113                | IF, secondary      |
| Anti-Goat IgG (H+L)    | Donkey      | Alexa Fluor 488     | Thermo Fisher Scientific | A32814                | IF, secondary      |

## Experimental Methods

### Cell lines and cell culture

*Primary BMDMs and BMDCs:* BMDMs and BMDCs were generated from the bone marrow of 6–8-week-old female C57BL/6 mice. For the generation of BMDMs cells were cultured in RPMI with 10% FCS, 10mM Hepes, Pen/Strep, 1mM Sodium Pyruvate, 1x  $\beta$ -Mercaptoethanol (all from Gibco) supplemented with 20ug/ml of murine colony stimulating factor (M-CSF, Prepotech #315-02). To generate BMDCs, bone marrow cells were and cultured in IMDM (Gibco) with 10% FCS (Gibco), Pen/Strep, 1mM Sodium Pyruvate (Gibco), 10mM Hepes and 1x  $\beta$ -Mercaptoethanol (Gibco) supplemented with 200ng/ml of FMS-like tyrosine kinase 3 ligand (Flt3L, Prepotech #250-31L). In both protocols,  $1-2 \times 10^6$  cells/ml were cultured in 10-cm plates for 10 days, with media exchange on day 5.

*B16 F1 MMP-overexpressing cell generation:* we used the multisite gateway cloning system for lentiviral plasmid assembly and to overexpress *Mmp2* and *Mmp9* with a lentiviral plasmid using the EF-1 $\alpha$  promoter. *Mmp2* and *Mmp9* inserts were cloned into an entry plasmid. Inserts were amplified by polymerase chain reaction (PCR) using the following primers: Fwd *Mmp2* EF1a ENTR (TAAGCTTGGTACCGAGCTCGGCCACCATGGAGGCTAGG), Rev *Mmp2* EF1a ENTR (ACTGTGCTGGATATCTGCAGTCAGCAGCCCAGCCAATC), Fwd *Mmp9* EF1a ENTR (TAAGCTTGGTACCGAGCTCGGCCACCATGAGTCCCTGG) and Rev *Mmp9* EF1a ENTR (ACTGTGCTGGATATCTGCAGTCAAGGGCACTGCAGGAG). Amplified inserts were resolved on agarose gel and gel amplified using Qiagen's Qiaquick gel extraction kit (#28704). Gibson HiFi assembly was performed to clone the purified inserts into the entry vector (EF-1 $\alpha$  ENTR A plasmid) and then constructs were transformed into DH5 $\alpha$  competent cells (Thermo Fisher Scientific, #18265017). Picked colonies were isolated and cultured for miniprep for DNA isolation (Qiagen, #27104). Colony PCR was performed using the following primers: *Mmp2* EF1a ENTR

Fwd colony (GTACCGAGCTCGGCCACCATGGAGGCT), *Mmp9* EF1a ENTR Fwd colony (GGTACCGAGCTCGGCCACCATGAGTCCC) and pEF1a ENTR Rev colony (GGTGATGGTGTATGATGACCGGTACGCGTAG). A few of the selected colonies picked from the PCR were sequenced and then one colony each for *Mmp2* and *Mmp9* was chosen. Multisite gateway LR recombination was performed using Invitrogen's Gateway LR Clonase II enzyme mix so that the inserts under the EF-1 $\alpha$  promoter could be cloned into a destination vector containing puromycin resistance cassette (PuroR plasmid). Cloned products were transformed into Stlb3 competent cells (Thermo Fisher Scientific, #C737303), colonies were picked and grown for miniprep isolation and diagnostic digestion using restriction enzymes (R.E.). Selected colonies were then grown into large cultures and isolated by endotoxin-free maxiprep (Qiagen, #12362). Finally, purified plasmids were co-transfected with GAG, VSV-G and Rev plasmids into HEK293T cells using lipofectamine 3000 (Thermo Fisher Scientific, #L3000015) or Calcium Chloride (CaCl<sub>2</sub>) and viral supernatants were collected and concentrated by ultra-centrifugation (20000 g, 90 min). Concentrated viruses were transduced into B16 melanoma cells and transduced cells were selected using puromycin.

*B16 F1 Mmp2 CRISPR knock out generation:* sgRNAs for mouse *Mmp2* were ordered from Genscript ([www.genscript.com](http://www.genscript.com)), in addition to pLentiCas9-EGFP plasmid. A total of three sgRNA were ordered – sgRNA #3 (Sequence: GATGTGGCCAACTACAACCTT; Position: Exon 2; targets the negative strand), sgRNA #4 (Sequence: TGCGGAAGCCAAGATGTGGC; Position: exon 2; targets the negative strand) and Sequence: CATTGGTTACACACCTGACC; Position: Exon 3; targets the positive strand). Plasmids were grown and isolated by maxiprep using Qiagen's Endo-free maxiprep kit (#12362). sgRNA #3 and #5 were then selected for Lentiviral generation. HEK293T cells were transfected with pLentiCas9-EGFP plasmid or sgRNA #3 or #5 plasmids + Lentiviral packaging plasmids (Gag+Rev+VSV-G), using Lipofectamine 3000 (Thermo Fischer Scientific # L3000015) in a 1:2 ration DNA:LP3000. 48 hours post transfection, viral supernatants

were collected, and virus was concentrated by ultra-centrifugation at 20000rpm, for 90 minutes at 4°C, then resuspended in 1x PBS and frozen. B16 cells were cultured at  $1.5 \times 10^5$  cells per well in 6-well plates and transduced with pLentiCas9-EGFP concentrated virus at 1:1000 and 1:2000 dilution in the presence of polybrene at 4µg/ml concentration. Cells were spun at 2000 rpm for 20 min at RT and then cultured for 2-3 days. Confluent cells were then sorted based on their GFP expression, which indicated Cas9 expression. Cas9-GFP<sup>high</sup> cells were then re-plated on 6-well plates in a  $1.5 \times 10^5$  cells per well concentration and re-transduced with *Mmp2* sgRNA #3 or #5 lentivirus at a 1:1000 and 1:2000 dilution as described above. 2-3 days post *Mmp2* sgRNA lentivirus transduction, cells were cultured in the presence of puromycin (1 µg/ml and 2.5 µg/ml) for sgRNA expression selection. gDNA was isolated from puromycin resistant cells for confirming mutation using IDT's Surveyor Mutation Detection Kit (#706020). Finally, after confirming Cas9-*Mmp2* mutation had occurred, we generated single cell clones for a more homogenous population of B16 cells that are KO for *Mmp2*, selecting the B16 F1 Cas9<sup>high</sup> sg3 D1 clone cells for our experiments, herein known as F1 *Mmp2* KO cells. We also used F1 Cas9<sup>high</sup> no sgRNA as controls.

### **Cell stimulation**

Im-Macs, BMDCs and BMDMs were seeded in 96 flat-bottom well plates at 200,000 cells/well for primary cells and 100,000 cells/well for Im-Macs and stimulated with 5ug/ml rhMMP2 (Enzo Life Sciences), rh-MMP9 (EMD Millipore) or vehicle control (Enzo Life Sciences); 100ng/ml of Ultrapure LPS ; Pam3CSK4, MALP2 and R848 (all from Invivogen) and 2µg/ml HMW PolyI:C (Invivogen). Cells were stimulated in Ex vivo 10 serum-free media (Lonza Biosciences, # 04-380Q) for 16-20 hours for CBA and 8 hours for RT-PCR, at 37°C.

### **HEK293T cell transient transfection**

2.5-3x10<sup>6</sup> HEK293T cells (ATCC #CRL-3216, RRID:CVCL\_0063) were plated in 10cm plates in DMEM with 10% FBS, and L-Glutamine and cultured overnight at 37°C before transfection with 5ug of each plasmid, using Lipofectamine 3000 (Thermo Fisher Scientific; #L3000008) at a 1:2 ratio DNA:Lipofectamine in 1ml of Opti-MEM reduced serum media (Thermo Fisher Scientific; #31985062) for 16-20 hours.

### **Western Blotting**

HEK293T cells were collected in B150 lysis buffer (20mM Tris HCl, pH8; 150mM KCl; 10% glycerol; 5mM MgCl<sub>2</sub>; 0.1% NP-40), incubated on ice for 30 minutes and centrifuged at 4°C, 14000 rpm for 16 minutes. The supernatant collected contained the protein lysates. Protein quantification was performed using a Bradford assay with a 1x dye from Biorad. Lysates were separated as described before (13). Briefly, proteins were resolved by SDS/PAGE 180-200V and transferred to PVDF membranes. Membranes were blocked using TBS/0.1% Tween-20 + 5% Milk or Bovine Soluble Albumin (BSA), probed overnight with primary antibodies and incubated with secondary antibodies for 2 hours at RT. Blots were incubated with ECL plus WB substrate (Pierce #32132), exposed to on films and developed. A complete list of primary and secondary antibodies used is in Supplemental table S1.

### **Co-immunoprecipitation**

Lysates from cells transfected with FLAG, MYC and HA-tagged plasmids were isolated using B150 lysis buffer. 200µg of protein lysate was used for co-immunoprecipitation. Protein was incubated with anti-FLAG M2 magnetic beads (Sigma-Aldrich, #M8823), Monoclonal anti-HA agarose antibody (Sigma-Aldrich, #A2095) or Anti-c-MYC Agarose Affinity gel antibody (Sigma-Aldrich #A7470) overnight. For immunoprecipitation, samples were eluted using 3x FLAG peptide (Millipore Sigma, #4799), HA peptides (Sigma-Aldrich, #I2149) or c-MYC peptide (Sigma-Aldrich, #M2435). Samples were further analyzed using western blotting.

## **Bone-marrow (BM) chimeras**

BM isolation: Tibia and femurs of donor mice (WT CD45.1 or *Tlr2<sup>-/-</sup>Tlr4<sup>-/-</sup>*) were collected. The tips of the bones were cut and using a 27G needle and BM flushed with RPMI, into 50ml tubes with a 70µm strainer. To make single cell suspensions, cells were passed through the strainer with the use of a syringe plunger. Cells were centrifuged and then red blood cells lysed by incubation with ACK lysis buffer (Life Technologies).

Irradiation and BM injections: CD45.1 or *Tlr2<sup>-/-</sup>Tlr4<sup>-/-</sup>* mice were irradiated with 2 doses of 600 rads (6Gy), 4 hours apart. Mice were restrained for 1-4 minutes in a tail vein restrainer, 100ul ( $4 \times 10^6$  cells) of cell suspension was injected into the tail vein. 6-8 weeks post BM transfers, 1-2 droplets of blood were collected by submandibular bleeding using lancets. Blood was lysed of red blood cells and stained with an antibody cocktail mix for 30 minutes. FACS was performed to check CD45.1 versus CD45.2 engraftment and CD45.1 recipients were reconstituted with CD45.2 BM to a 83-95% purity.

## **Cytometry by Time of Flight (CyTOF)**

$3-5 \times 10^6$  live cells were resuspended in 1x PBS and filtered into 40µm strainer top tubes. Cells were taken for CyTOF at the Human Immune Monitoring Core facility of the Tisch Cancer Institute, Icahn School of Medicine at Mount Sinai (<https://icahn.mssm.edu/research/human-immune-monitoring-center>), where they were prepared for CyTOF as per the facility protocol. One lymphoid and one myeloid panel were designed, and samples were analyzed based on these. Antibodies panel and metal conjugations were generated and optimized by the Human Immune Monitoring Core facility. Supplemental table S3 contains the complete list of metal-conjugated antibodies.

## **RNA extraction and RT-PCR**



Cells were isolated and stored in RLT Buffer with  $\beta$ -Mercaptoethanol or Trizol Reagent. Upon thawing, RNA was extracted with RNeasy Mini Kit (Qiagen, #74104), according to manufacturer's instructions. cDNA synthesis was performed using Sigma's ReadyScript cDNA Synthesis Mix (Sigma, #RDTR). RT-PCR was done using Qiagen's RT<sup>2</sup> SYBR green Master Mix with fluorescein (Qiagen, #330519).

### **Immunofluorescence of frozen sections**

Frozen slides were washed for 10min in 1x PBS or TBS. Using a PAP pen, tissue sections were delineated. Tissues were permeabilized by incubating with 1x TBS + 0.1% Triton-X for 15min at RT, then washed with 1x TBS. Blocked the tissues with 10% BSA/TBS for 15-20min at RT in the humid chamber (or 20% serum + TBS + 0.5% BSA). Primary antibodies were prepared in the blocking buffer used and slides were incubated overnight at 4°C. Slides were washed for 10min in TBS, RT. Secondary antibodies were prepared in 1x TBS and incubated at RT, dark for 1-2 hours. Slides were washed twice in 1x TBS and then mounted using ProLong Antifade Reagent with DAPI (Thermo Fisher Scientific, #P36931). Coverslips were added (Fisherbrand microscope cover glass, #12-545-M) and bubbles were removed by gentle pressing on the coverslips. Slides were dried in the dark and kept in the dark before imaging. Supplemental table S4 includes a list of antibodies used.

### **IF quantification and colocalization analysis**

*Quantification:* Fluorescence quantification was performed using ImageJ's Fluorescence measure analysis tool (ImageJ). Several images from the tumor sections were used and 2 different tumors from each cell type were used for quantification. Briefly, from the Analyze menu select "set measurements". Select the tumor area as the region of interest (ROI) and set a fluorescence threshold to minimize background. Then select "Measure" from the analyze menu. The mean area of fluorescence will pop up on a table in a separate window.

*Co-localization:* Fluorescence co-localization was performed using ImageJ's colocalization plugin (Coloc2) as described in the developer's website (<https://imagej.net>). As described: Coloc 2 applies the pixel intensity correlation over space methods of Pearson, for scatterplots, analysis, automatic thresholding and statistical significance testing. We plotted the Pearson's coefficient values for colocalization.
